# Supplementary figures and images for: Trigger tool-based description of adverse events in helicopter emergency medical services in Qatar
Source: HighWire-hosted journal article supplement (doi:10.1136/bmjoq-2023-002263), 2023-11-01

## Appendix II HEMS Trigger Tool Database Development

### HEMSTT Database Development

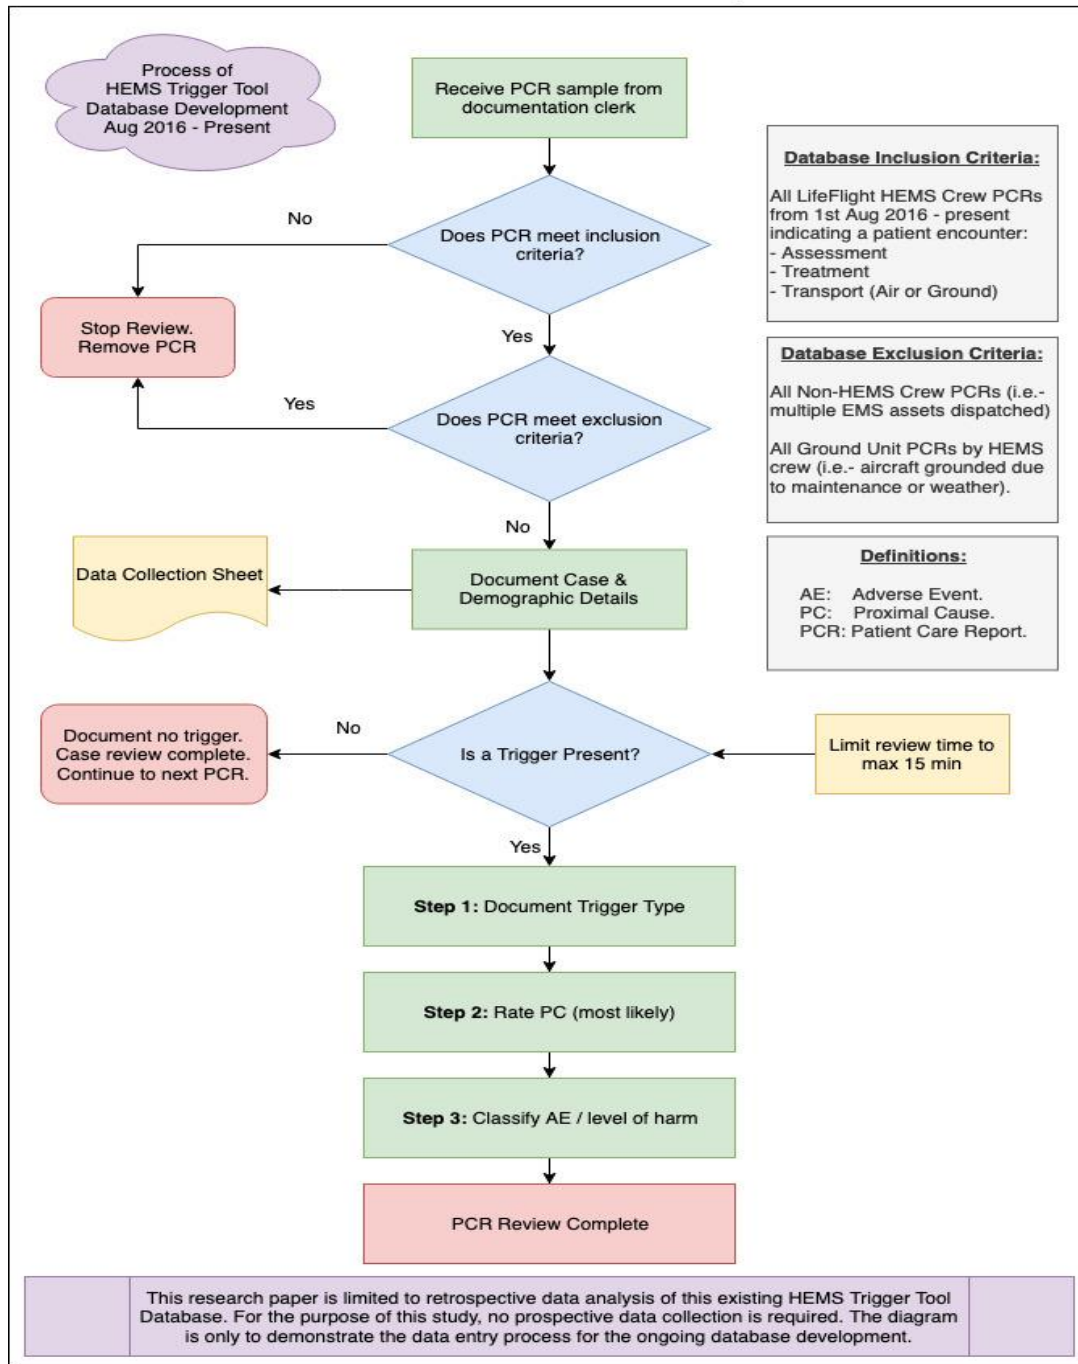

Supplement: bmjoq-2023-002263supp002_data_supplement.pdf [file bmjoq-2023-002263supp002_data_supplement.pdf]
